# Supplementary material for: Probing the binding interaction between cadmium(ii) chloride and lysozyme
Source: Royal Society of Chemistry journal article supplement (doi:10.1039/c5nj02911b), 2016-01-01
Supplement: c5nj02911b1.pdf [file c5nj02911b1.pdf]

New Journal of Chemistry

## Supplementary information

### Probing the Binding Interaction between Cadmium (II) Chloride and Lysozyme

Jing Wang<sup>a</sup>, Xinping Yang<sup>a</sup>, Jihu Wang<sup>a,b</sup>, Chi Xu<sup>a</sup>, Wandi Zhang<sup>a</sup>, Rutao Liu<sup>a\*</sup>,  
Wansong Zong<sup>c</sup>

<sup>a</sup> School of Environmental Science and Engineering, Shandong University, China–  
America CRC for Environment & Health, Shandong Province, 27# Shanda South  
Road, Jinan 250100, P.R. China

<sup>b</sup> College of Chemistry Chemical Engineering and Material Science, Zaozhuang  
University, Zaozhuang, Shandong 277160, China

<sup>c</sup> College of Population, Resources and Environment, Shandong Normal University,  
88# East Wenhua Road, Jinan 250014, PR China.

\*All correspondence should be addressed to:

Rutao Liu

School of Environmental Science and Engineering,  
Shandong University, Jinan 250100 P.R.China

Phone/Fax: 86-531-88364868

Email: [rutaoliu@sdu.edu.cn](mailto:rutaoliu@sdu.edu.cn) (Liu RT)

#### Paper Summary

Characters with spaces: 23,520

Number of figures: 7

Number of tables: 4

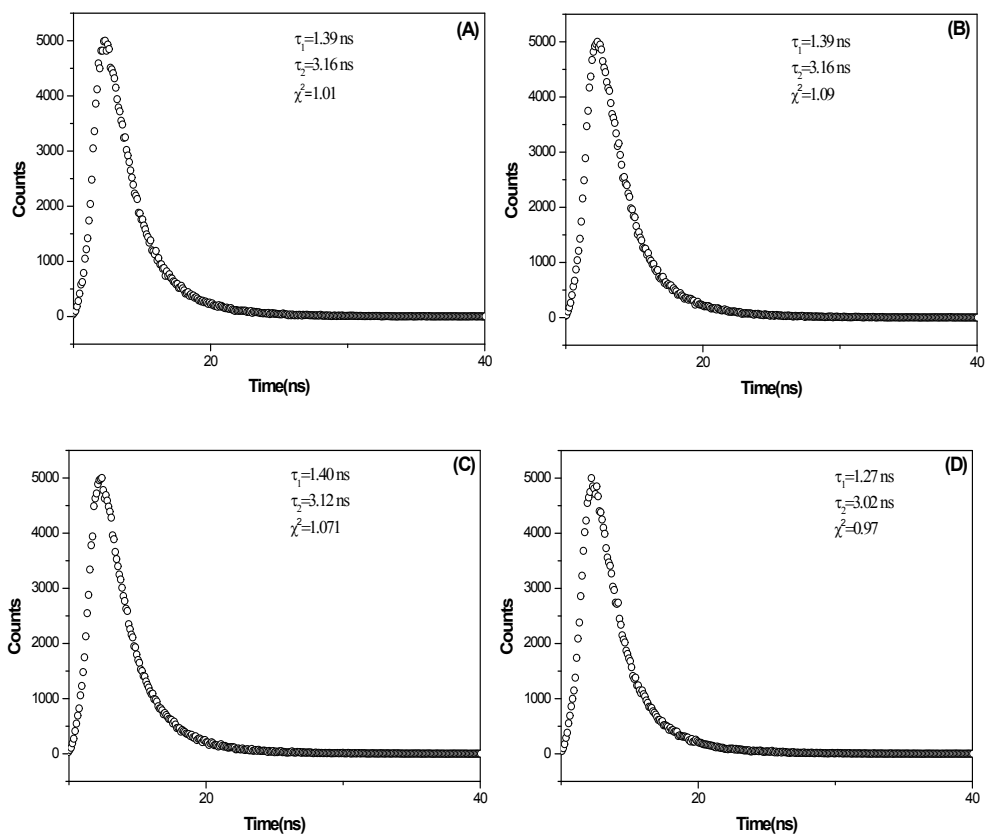

**Fig. S1** Time-resolved fluorescence decay profile of CdCl<sub>2</sub>-lysozyme system. Conditions: T= 298K, pH=7.4, c (lysozyme) =  $5 \times 10^{-6}$  M, c (CdCl<sub>2</sub>) ( $10^{-4}$  M) A-D: 0, 1,5,10.

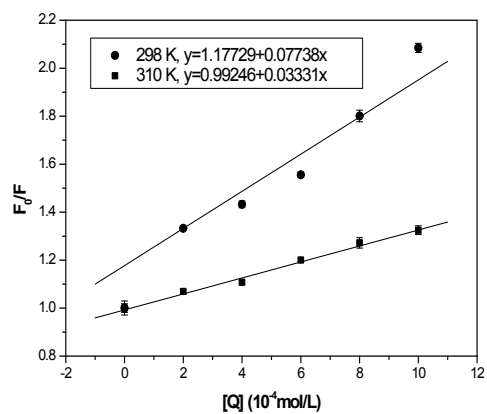

**Fig. S2** Stern-Volmer plots for the quenching of lysozyme ( $5 \times 10^{-6}$  M) by different concentration of  $\text{CdCl}_2$  ( $\times 10^{-4}$  M) (0, 2, 4, 6, 8, 10) at 298 K and 310 K at pH 7.4.

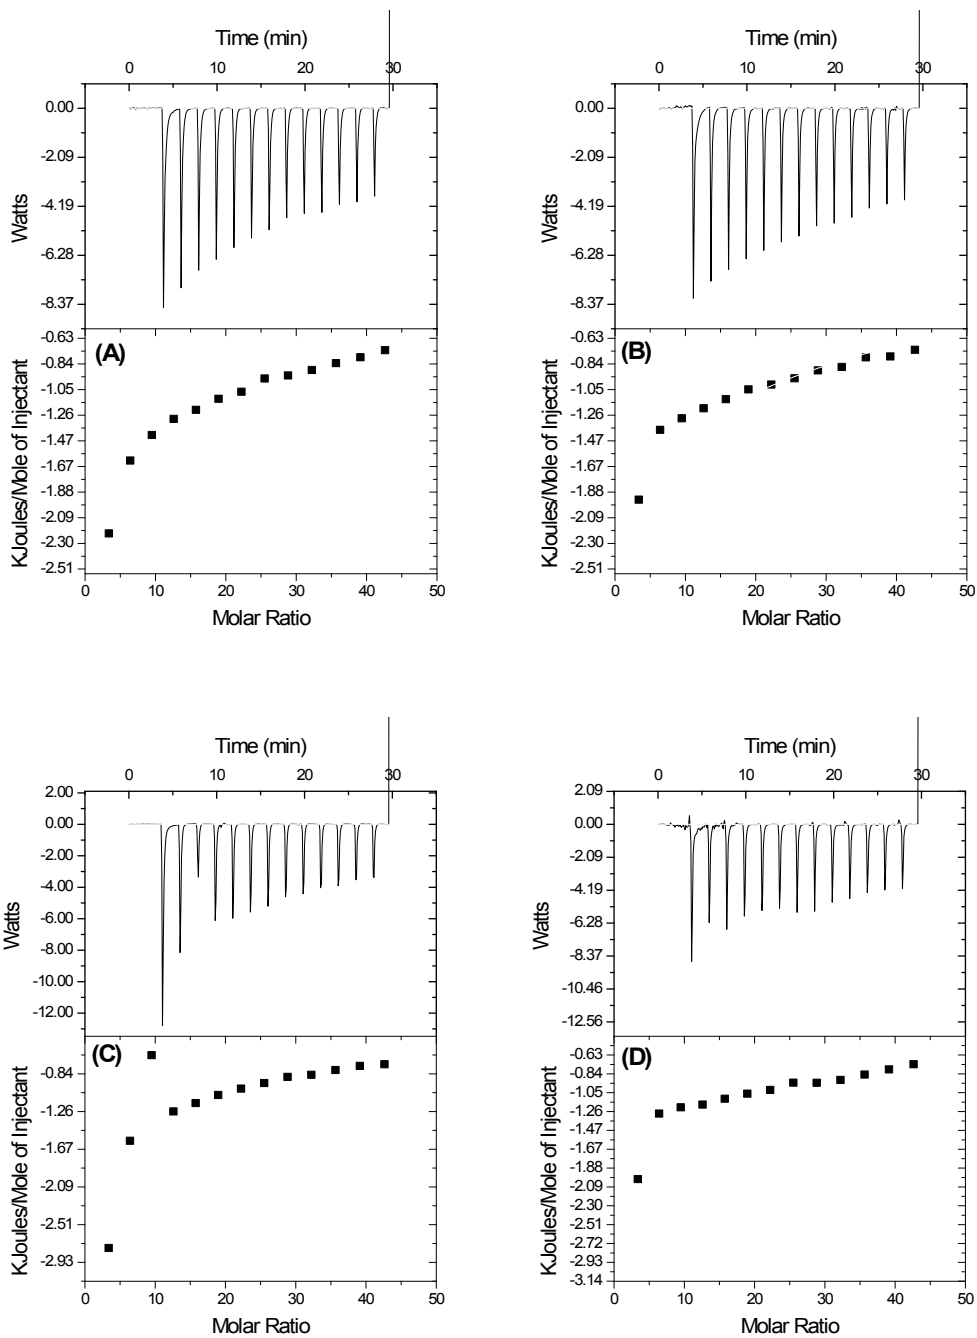

**Fig. S3** ITC profiles of the interaction between lysozyme and CdCl<sub>2</sub> at 298.15 K and 310.15 K. (A) Sequential titration of CdCl<sub>2</sub> solution into buffer solution at 298.15 K. (B) Sequential titration of CdCl<sub>2</sub> solution into lysozyme solution at 298.15 K. (C) Sequential titration of CdCl<sub>2</sub> solution into buffer solution at 310.15 K. (D) Sequential titration of CdCl<sub>2</sub> solution into lysozyme solution at 310.15 K. Conditions: c(lysozyme)=100 μM, c(CdCl<sub>2</sub>)=20 mM. Tris-HCl buffer (0.02 M, pH=7.4)

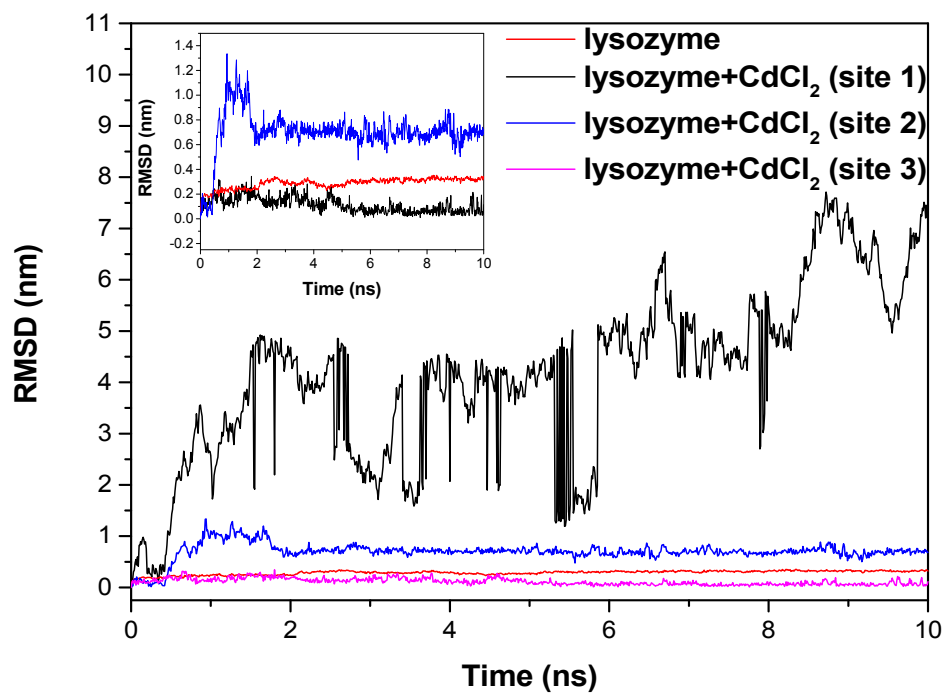

**Fig. S4.** Time dependence of RMSD values of lysozyme and lysozyme-CdCl<sub>2</sub> complexes during 10 ns MD simulation.

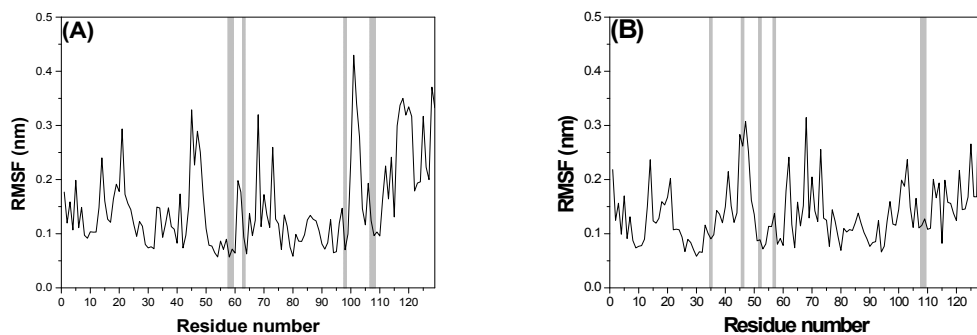

**Fig.S5** RMSF values of lysozyme and lysozyme-CdCl<sub>2</sub> complexes were plotted against residue numbers. The residues located in the site are highlighted by gray bars. (A) Site 2. (B) Site 3.

**Table S1.** Energy ranked conformers through docking with CdCl<sub>2</sub>, CdCl<sup>+</sup>, Cd<sup>2+</sup> and Cl<sup>-</sup> from low to high.

| Species           | Energy(kcal/mol) |
|-------------------|------------------|
| CdCl <sub>2</sub> | -35.76           |
| CdCl <sub>2</sub> | -10.26           |
| CdCl <sub>2</sub> | -9.02            |
| CdCl <sup>+</sup> | -8.03            |
| CdCl <sup>+</sup> | -8.0             |
| CdCl <sup>+</sup> | -7.86            |
| Cd <sup>2+</sup>  | -0.76            |
| Cl <sup>-</sup>   | >0               |
